# Supplementary material
Source: PubMed Central journal article supplement (PMC3214912)

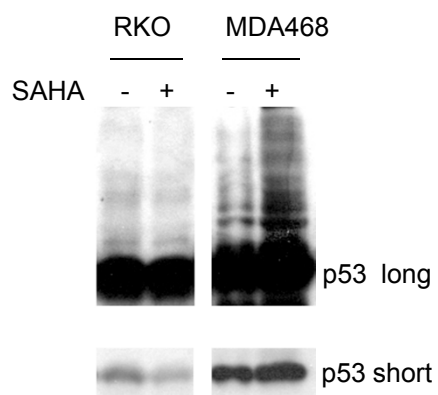

a

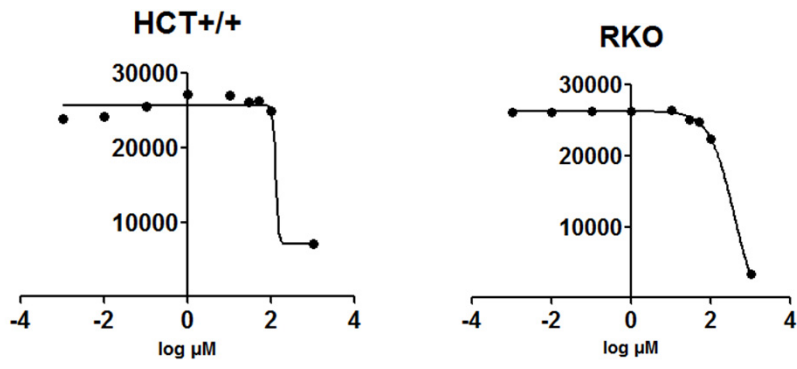

b

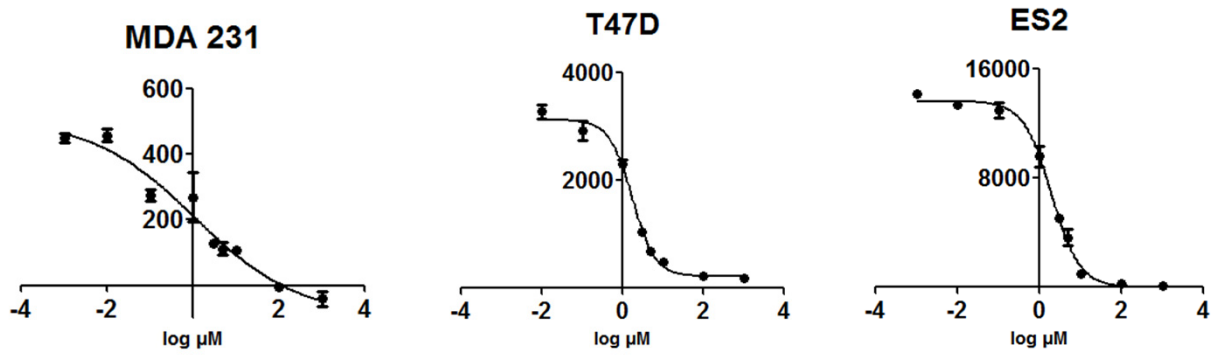

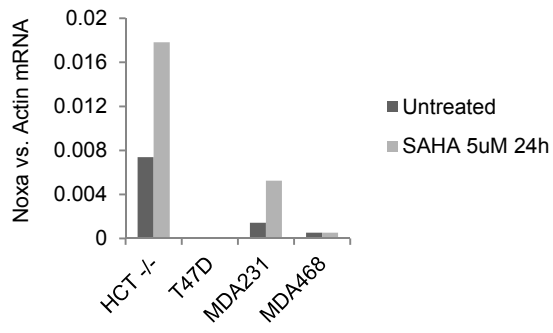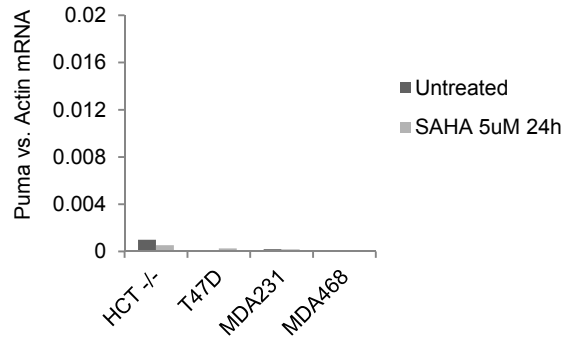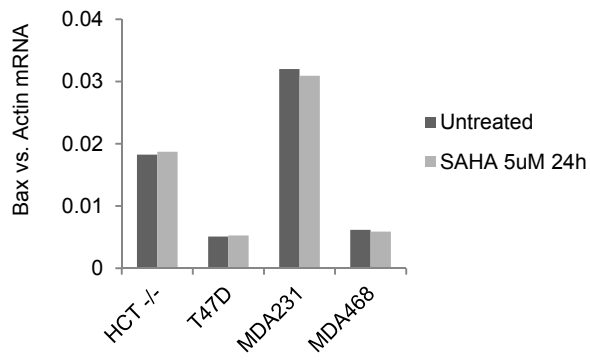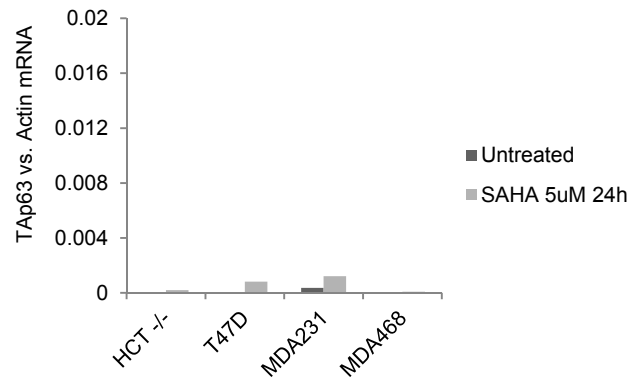

Suppl. Fig. 3

Supplement: cdd201171x1.pdf [file cdd201171x1.pdf]
